# Supplementary material
Source: PubMed Central journal article supplement (PMC3705598)
Supplement: cdd201334x1.pdf [file cdd201334x1.pdf]

## Genes down-regulated in C2C12-FOXC2 (PM)

| GO Term                                                          | P Value  | Genes                                                                 |
|------------------------------------------------------------------|----------|-----------------------------------------------------------------------|
| GO:0030239~myofibril assembly                                    | 1.15E-05 | TNNT2, XIRP1, NEB, ACTA1, TTN                                         |
| GO:0031032~actomyosin structure organization                     | 3.62E-05 | TNNT2, XIRP1, NEB, ACTA1, TTN                                         |
| GO:0014706~striated muscle tissue development                    | 5.29E-05 | TNNT2, MYOD1, XIRP1, ACTA1, PDLIM3, VGLL2, TTN, TNNI1                 |
| GO:0007517~muscle organ development                              | 6.04E-05 | TNNT2, MYOD1, DES, XIRP1, ACTA1, PDLIM3, VGLL2, TTN, TNNI1            |
| GO:0045214~sarcomere organization                                | 6.87E-05 | TNNT2, XIRP1, NEB, TTN                                                |
| GO:0060537~muscle tissue development                             | 8.17E-05 | TNNT2, MYOD1, XIRP1, ACTA1, PDLIM3, VGLL2, TTN, TNNI1                 |
| GO:0010927~cellular component assembly involved in morphogenesis | 1.58E-04 | TNNT2, XIRP1, NEB, ACTA1, TTN                                         |
| GO:0007010~cytoskeleton organization                             | 1.95E-04 | TNNT2, TPPP3, SGCG, XIRP1, NEB, ACTA1, MTAP2, PDLIM3, TTN, NEFL, NEFM |
| GO:0051146~striated muscle cell differentiation                  | 5.95E-04 | TNNT2, MYOD1, XIRP1, NEB, ACTA1, TTN                                  |
| GO:0055002~striated muscle cell development                      | 7.63E-04 | TNNT2, XIRP1, NEB, ACTA1, TTN                                         |

## Genes up-regulated in C2C12-FOXC2 (PM)

| GO Term                                           | P Value  | Genes                                                                                                                                                                                          |
|---------------------------------------------------|----------|------------------------------------------------------------------------------------------------------------------------------------------------------------------------------------------------|
| GO:0006955~immune response                        | 2.36E-09 | ENPP1, C3, ENPP2, CCL9, C1S, OAS2, CXCL12, CD74, H60B, C1RB, OASL2, TAP1, VNN1, LBP, MR1, SPON2, MPA2L, DHX58, H2-K1, GBP6, IL1RL1, IL1RL2, IL1RN, COLEC12, TINAGL1, DDX58, GM5077, IRF7, GBP3 |
| GO:0030198~extracellular matrix organization      | 6.61E-07 | RECK, A930038C07RIK, SMOC2, AGT, FBLN5, TGFBI, PDGFRA, POSTN, ADAMTS2, ABI3BP, EMILIN1, DPT                                                                                                    |
| GO:0007155~cell adhesion                          | 1.25E-06 | POSTN, ITGBL1, LGALS3BP, FAT4, AGT, TGFBI, COL6A2, COL6A1, VNN1, ROBO2, SPON2, DPT, PCDHB9, HAPLN4, SVEP1, ADAM23, THY1, EMILIN1, PCDH18, LAMA4, PGM5, SNED1, FBLN5, CLDN1, PERP, MFAP4, AOC3  |
| GO:0043062~extracellular structure organization   | 5.19E-06 | RECK, POSTN, ABI3BP, EMILIN1, SMOC2, A930038C07RIK, FBLN5, AGT, TGFBI, PDGFRA, AGRN, ADAMTS2, DPT                                                                                              |
| GO:0006952~defense response                       | 3.87E-05 | H2-K1, KNG1, C3, IL1RL1, IL1RL2, EPHX2, IFI47, C1S, CHI3L4, CD74, DDX58, S1PR3, C1RB, GM5077, TAP1, CLEC2D, PLA2G7, VNN1, LBP, IGFBP4, DHX58                                                   |
| GO:0045087~innate immune response                 | 5.69E-05 | DDX58, GM5077, C1RB, IL1RL1, C3, IL1RL2, VNN1, C1S, LBP, DHX58                                                                                                                                 |
| GO:0060348~bone development                       | 1.22E-04 | <b>BMP4</b> , FGFR2, CHRDL1, IGF1, PTN, IGF2, COL1A1, PAPSS2, MMP13, MMP2                                                                                                                      |
| GO:0048729~tissue morphogenesis                   | 1.29E-04 | <b>BMP4</b> , FGFR2, EGFR, FGF7, FST, TCFAP2A, IGF1, CYP7B1, RGMA, <b>WNT4</b> , AGT, TGFBR3, FOXD1, TWIST1                                                                                    |
| GO:0030574~collagen catabolic process             | 1.33E-04 | MMP19, MMP16, ADAMTS2, MMP13, MMP2                                                                                                                                                             |
| GO:0001763~morphogenesis of a branching structure | 1.89E-04 | <b>BMP4</b> , FGFR2, <b>WNT4</b> , EPHA7, FGF7, AGT, TGM2, IGF1, FOXD1, CXCL12                                                                                                                 |
| GO:0001944~vasculature development                | 2.11E-04 | <b>BMP4</b> , RECK, FGFR2, MMP19, MMP2, CXCL12, THY1, LAMA4, AGT, TGM2, TGFBR3, COL1A1, PPAP2B, FIGF                                                                                           |
| GO:0001501~skeletal system development            | 2.17E-04 | <b>BMP4</b> , FGFR2, TCFAP2A, IGF1, IGF2, DLK1, MMP2, MMP13, OSR2, CHRDL1, HOXD8, PDGFRA, PTN, COL1A1, PAPSS2                                                                                  |
| GO:0001503~ossification                           | 3.12E-04 | BMP4, FGFR2, CHRDL1, IGF1, PTN, IGF2, COL1A1, MMP13, MMP2                                                                                                                                      |

## Genes down-regulated in C2C12-FOXC2 (D3)

| GO Term                                                          | P Value  | Genes                                                                                                                 |
|------------------------------------------------------------------|----------|-----------------------------------------------------------------------------------------------------------------------|
| GO:0003012~muscle system process                                 | 3.86E-13 | MYH1, MYH7, ACTN3, TTN, TRIM63, TPM2, TRIM72, MYH8, CACNA1S, TNNT2, MYOM2, MYL6B, RYR1, MYOM1                         |
| GO:0006936~muscle contraction                                    | 2.18E-12 | MYH1, MYH7, ACTN3, TTN, TRIM63, TPM2, MYH8, CACNA1S, TNNT2, MYOM2, MYL6B, RYR1, MYOM1                                 |
| GO:0031032~actomyosin structure organization                     | 1.88E-10 | TNNT2, MURC, ACTC1, XIRP1, NEB, ACTA1, LIMCH1, TTN, TMOD1                                                             |
| GO:0030239~myofibril assembly                                    | 8.59E-10 | TNNT2, MURC, ACTC1, XIRP1, NEB, ACTA1, TTN, TMOD1                                                                     |
| GO:0007517~muscle organ development                              | 1.14E-09 | MEF2C, ACTC1, ACTA1, PDLIM3, MYL6B, MYOG, UNC45B, TRIM72, TTN, CACNA1S, CSRP3, TNNI1, TNNT2, MURC, XIRP1, MYL6B, MYOG |
| GO:0014706~striated muscle tissue development                    | 1.63E-09 | MEF2C, ACTC1, ACTA1, PDLIM3, MYL6B, MYOG, TTN, CSRP3, CACNA1S, TNNI1, TNNT2, MURC, XIRP1, MYL6B, MYOG                 |
| GO:0060537~muscle tissue development                             | 3.80E-09 | MEF2C, ACTC1, ACTA1, PDLIM3, MYL6B, MYOG, TTN, CSRP3, CACNA1S, TNNI1, TNNT2, MURC, XIRP1, MYL6B, MYOG                 |
| GO:0010927~cellular component assembly involved in morphogenesis | 4.73E-09 | TNNT2, MURC, ACTC1, XIRP1, NEB, ACTA1, NEURL1A, TTN, TMOD1                                                            |
| GO:0055002~striated muscle cell development                      | 7.49E-09 | TNNT2, MURC, ACTC1, XIRP1, NEB, ACTA1, MYOG, TTN, CACNA1S, TMOD1                                                      |
| GO:0055001~muscle cell development                               | 2.28E-08 | TNNT2, MURC, ACTC1, XIRP1, NEB, ACTA1, MYOG, TTN, CACNA1S, TMOD1                                                      |
| GO:0030029~actin filament-based process                          | 8.51E-08 | ACTC1, ACTA1, PDLIM3, TTN, DAAM2, TNNT2, MURC, XIRP1, NRAP, SORBS1, NEB, MYL6B, LIMCH1, TMOD1                         |
| GO:0007519~skeletal muscle tissue development                    | 1.51E-04 | MEF2C, ACTA1, MYL6B, PDLIM3, MYL6B, MYOG, CACNA1S                                                                     |
| GO:0032989~cellular component morphogenesis                      | 1.58E-04 | ABLIM1, ACTC1, ACTA1, PKHD1, HGF, TTN, TNNT2, MURC, XIRP1, NEB, CLIC5, NEURL1A, DCLK1, TMOD1                          |
| GO:0060538~skeletal muscle organ development                     | 1.76E-04 | MEF2C, ACTA1, MYL6B, PDLIM3, MYL6B, MYOG, CACNA1S                                                                     |
| GO:0045214~sarcomere organization                                | 2.12E-04 | TNNT2, XIRP1, NEB, TTN                                                                                                |

## Genes up-regulated in C2C12-FOXC2 (D3)

| GO Term                               | P Value  | Genes                                                                                                                                                                                                                                                                                                                                                                                                                                                                                                                                                                                                                                          |
|---------------------------------------|----------|------------------------------------------------------------------------------------------------------------------------------------------------------------------------------------------------------------------------------------------------------------------------------------------------------------------------------------------------------------------------------------------------------------------------------------------------------------------------------------------------------------------------------------------------------------------------------------------------------------------------------------------------|
| GO:0007049~cell cycle                 | 1.76E-39 | GAS2L3, PRC1, E2F7, DBF4, KNTC1, AURKA, AURKB, PTTG1, CDT1, FAM83D, CCNE2, CDCA8, OIP5, MTBP, CDCA5, CCNA2, ASPM, CDCA3, CDC6, KIF11, SGOL2, LIG1, SGOL1, CCNF, TPX2, 463243411RIK, NUSAP1, ESPL1, MCM2, HMGA2, MCM3, TACC3, UBE2C, ESCO2, AHR, RAD51, UHRF1, CCND1, MAD2L1, SPAG5, BUB1B, CKS1B, NEK2, ANLN, CHEK2, CEP55, C79407, GM8956, SPC25, NCAPH, NCAPG2, F630043A04RIK, BUB1, FBXO5, ZWILCH, LFNG, HELLS, TRIP13, ERCC6L, EXO1, CKAP2, MKI67, DLGAP5, GMNN, PSRC1, KIF18A, NUF2, CENPF, BIRC5, CDC20, CENPE, CDC25C, CDKN3, RACGAP1, SMC2, 2610039C10RIK, CCNB1, CCNB2, RGS2, PLK1, RASSF2, KIF20B, CKS2, CENPV, CIT, GM10124, CHAF1B |
| GO:0000279~M phase                    | 1.04E-36 | KNTC1, PTTG1, AURKB, FAM83D, CDCA8, OIP5, CDCA5, CCNA2, ASPM, CDCA3, CDC6, KIF11, SGOL2, SGOL1, CCNF, TPX2, NUSAP1, ESPL1, UBE2C, TACC3, HMGA2, RAD51, MAD2L1, SPAG5, BUB1B, NEK2, ANLN, CEP55, C79407, GM8956, SPC25, NCAPH, NCAPG2, F630043A04RIK, BUB1, FBXO5, ZWILCH, LFNG, HELLS, TRIP13, ERCC6L, EXO1, MKI67, DLGAP5, KIF18A, NUF2, CENPF, CDC20, CENPE, BIRC5, CDC25C, SMC2, 2610039C10RIK, CCNB1, CCNB2, PLK1, CENPV, KIF20B, CKS2, CIT                                                                                                                                                                                                |
| GO:0022403~cell cycle phase           | 4.76E-36 | DBF4, KNTC1, PTTG1, AURKB, FAM83D, CDCA8, OIP5, MTBP, CDCA5, CCNA2, ASPM, CDCA3, CDC6, KIF11, SGOL2, SGOL1, CCNF, TPX2, NUSAP1, ESPL1, HMGA2, UBE2C, TACC3, RAD51, CCND1, MAD2L1, SPAG5, BUB1B, NEK2, ANLN, CEP55, C79407, GM8956, SPC25, NCAPH, NCAPG2, F630043A04RIK, BUB1, FBXO5, ZWILCH, LFNG, HELLS, TRIP13, ERCC6L, EXO1, MKI67, DLGAP5, KIF18A, NUF2, CENPF, CDC20, CENPE, BIRC5, CDC25C, SMC2, 2610039C10RIK, CCNB1, CCNB2, PLK1, CENPV, KIF20B, CKS2, CIT                                                                                                                                                                             |
| GO:0022402~cell cycle process         | 3.28E-35 | GAS2L3, DBF4, KNTC1, AURKB, PTTG1, FAM83D, CDCA8, OIP5, MTBP, CDCA5, CCNA2, ASPM, CDCA3, CDC6, KIF11, SGOL2, SGOL1, CCNF, 463243411RIK, TPX2, NUSAP1, ESPL1, HMGA2, UBE2C, TACC3, RAD51, CCND1, MAD2L1, SPAG5, BUB1B, NEK2, ANLN, CEP55, C79407, GM8956, SPC25, NCAPH, NCAPG2, F630043A04RIK, BUB1, FBXO5, ZWILCH, LFNG, HELLS, TRIP13, ERCC6L, EXO1, MKI67, DLGAP5, KIF18A, NUF2, CENPF, CDC20, CENPE, BIRC5, CDKN3, RACGAP1, CDC25C, SMC2, 2610039C10RIK, CCNB1, CCNB2, PLK1, KIF20B, CKS2, CENPV, CIT                                                                                                                                       |
| GO:0051301~cell division              | 9.40E-35 | PRC1, KNTC1, PTTG1, AURKB, CCNE2, FAM83D, CDCA8, CDCA7, OIP5, CDCA5, CCNA2, TOP2A, ASPM, CDCA3, CDC6, KIF11, SGOL2, LIG1, SGOL1, CCNF, NUSAP1, HMGA2, UBE2C, MCM5, CCND1, MAD2L1, SPAG5, BUB1B, CKS1B, NEK2, ANLN, CEP55, C79407, GM8956, SPC25, NCAPH, NCAPG2, F630043A04RIK, BUB1, FBXO5, ZWILCH, HELLS, ERCC6L, NUF2, CDC20, CENPE, BIRC5, RACGAP1, CDC25C, SMC2, 2610039C10RIK, CCNB1, CCNB2, PLK1, CENPV, KIF20B, CKS2, CIT, GM10124                                                                                                                                                                                                      |
| GO:0006260~DNA replication            | 4.83E-08 | CDC6, GLRB, DTL, DBF4, LIG1, POLE, MCM2, MCM3, MCM4, MCM5, RAD51, TK1, CDT1, CCNE2, RFC4, POLE2, CTGF, PRIM2, CHAF1B                                                                                                                                                                                                                                                                                                                                                                                                                                                                                                                           |
| GO:0006270~DNA replication initiation | 7.26E-05 | CCNE2, MCM2, MCM3, MCM4, MCM5                                                                                                                                                                                                                                                                                                                                                                                                                                                                                                                                                                                                                  |

Mouse cDNA primer  
sequences

| Gene               | 5'                      | 3'                     |
|--------------------|-------------------------|------------------------|
| MyoD               | ATGATGACCCGTGTTTCGACT   | CACCGCAGTAGGGAAGTGT    |
| Myogenin           | CATCCAGTACATTGAGCGCCTA  | GAGCAAATGATCTCCTGGGTTG |
| Myosin Heavy Chain | AAGTGACTGTGAAAACAGAAGCA | GCAGCCATTTGTAAGGGTTGAC |
| Wnt4               | AAGAGGAGACGTGCGAGAAAC   | GTCCCTTGTGTCACCACCTT   |
| Bmp4               | ATCTGGTCTCCGTCCCTGATGGG | TCTTGCTAGGCTGCGGACGG   |
| Foxc2              | AACCCAACAGCAAACCTTTCCC  | GCGTAGCTCGATAGGGCAG    |
| Runx2              | AACGATCTGAGATTTGTGGGC   | CCTGCGTGGGATTTCTTGTT   |
| Osterix            | AGCGACCACTTGAGCAAACAT   | GCGGCTGATTGGCTTCTTCT   |
| Osteocalcin        | CTGACCTCACAGATCCCAAGC   | TGGTCTGATAGCTCGTCACAAG |

Human cDNA primer  
sequences

| Gene  | 5'                    | 3'                  |
|-------|-----------------------|---------------------|
| FOXC2 | CCTCCTGGTATCTCAACCACA | GGTCGAGTTCTCAATCCCA |

| Mouse Wnt4 promoter region | 5'                   | 3'                   |
|----------------------------|----------------------|----------------------|
| Set 1                      | CCTGGCAACCTGAGTTTGAT | ACTTTTGGTGCTGGGAATTG |
| Set 2                      | CCCGGAACAGAATGGTACAC | ACTTTTGGTGCTGGGAATTG |
